# Supplementary material
Source: publisher figshare collection journal article supplement (https://acs.figshare.com/ndownloader/files/4246297)
Supplement: Supplementary file 1 [file 4246297]

 
data_rrm111s_compound_3a 


_publ_requested_journal             'Organic Letter'
_publ_contact_author
;
 Dr. Mateo Alajarin
Departamento de Quimica Organica
Facultad de Quimica, Universidad de Murcia
Campus de Espinardo, E-30100 Murcia (Spain)
;
_publ_contact_author_email             'alajarin@um.es'
_publ_section_title
;

Insertion of Benzynes into the P=N Bond of P-Alkenyl(alkynyl)-lambda5-phosphazenes

;

 
_audit_creation_method            SHELXL-97 
_chemical_name_systematic 
; 
 ? 
; 
_chemical_name_common             ? 
_chemical_melting_point           ? 
_chemical_formula_moiety          ? 
_chemical_formula_sum 
 'C28 H25 F3 N O4 P S' 
_chemical_formula_weight          559.52 
 
loop_ 
 _atom_type_symbol 
 _atom_type_description 
 _atom_type_scat_dispersion_real 
 _atom_type_scat_dispersion_imag 
 _atom_type_scat_source 
 'C'  'C'   0.0033   0.0016 
 'International Tables Vol C Tables 4.2.6.8 and 6.1.1.4' 
 'H'  'H'   0.0000   0.0000 
 'International Tables Vol C Tables 4.2.6.8 and 6.1.1.4' 
 'N'  'N'   0.0061   0.0033 
 'International Tables Vol C Tables 4.2.6.8 and 6.1.1.4' 
 'O'  'O'   0.0106   0.0060 
 'International Tables Vol C Tables 4.2.6.8 and 6.1.1.4' 
 'F'  'F'   0.0171   0.0103 
 'International Tables Vol C Tables 4.2.6.8 and 6.1.1.4' 
 'P'  'P'   0.1023   0.0942 
 'International Tables Vol C Tables 4.2.6.8 and 6.1.1.4' 
 'S'  'S'   0.1246   0.1234 
 'International Tables Vol C Tables 4.2.6.8 and 6.1.1.4' 
 
_symmetry_cell_setting            Monoclinic
_symmetry_space_group_name_H-M    'P 2 1/n'
 
loop_ 
 _symmetry_equiv_pos_as_xyz 
 'x, y, z' 
 '-x+1/2, y+1/2, -z+1/2' 
 '-x, -y, -z' 
 'x-1/2, -y-1/2, z-1/2' 
 
_cell_length_a                    9.6554(9) 
_cell_length_b                    18.4922(17) 
_cell_length_c                    14.7179(14) 
_cell_angle_alpha                 90.00 
_cell_angle_beta                  103.367(2) 
_cell_angle_gamma                 90.00 
_cell_volume                      2556.7(4) 
_cell_formula_units_Z             4 
_cell_measurement_temperature     100(2) 
_cell_measurement_reflns_used     5144
_cell_measurement_theta_min       2.20
_cell_measurement_theta_max       28.31
 
_exptl_crystal_description        prism
_exptl_crystal_colour             colourless
_exptl_crystal_size_max           0.15 
_exptl_crystal_size_mid           0.14 
_exptl_crystal_size_min           0.11 
_exptl_crystal_density_meas       ? 
_exptl_crystal_density_diffrn     1.454 
_exptl_crystal_density_method     'not measured' 
_exptl_crystal_F_000              1160 
_exptl_absorpt_coefficient_mu     0.248 
_exptl_absorpt_correction_type    multi-scan
_exptl_absorpt_correction_T_min   0.8822 
_exptl_absorpt_correction_T_max   0.9733 
_exptl_absorpt_process_details    SADABS 
 
_exptl_special_details 
; 
 ? 
; 
 
_diffrn_ambient_temperature       100(2) 
_diffrn_radiation_wavelength      0.71073 
_diffrn_radiation_type            MoK\a 
_diffrn_radiation_source          'fine-focus sealed tube' 
_diffrn_radiation_monochromator   graphite 
_diffrn_measurement_device_type   'Bruker SMART APEX CCD' 
_diffrn_measurement_method        \w-scan 
_diffrn_detector_area_resol_mean  8.26
_diffrn_standards_number          ? 
_diffrn_standards_interval_count  ? 
_diffrn_standards_interval_time   ? 
_diffrn_standards_decay_%         ? 
_diffrn_reflns_number             31494 
_diffrn_reflns_av_R_equivalents   0.0305 
_diffrn_reflns_av_sigmaI/netI     0.0265 
_diffrn_reflns_limit_h_min        -12 
_diffrn_reflns_limit_h_max        12 
_diffrn_reflns_limit_k_min        -24 
_diffrn_reflns_limit_k_max        24 
_diffrn_reflns_limit_l_min        -19 
_diffrn_reflns_limit_l_max        19 
_diffrn_reflns_theta_min          1.80 
_diffrn_reflns_theta_max          28.70 
_reflns_number_total              6248 
_reflns_number_gt                 5448 
_reflns_threshold_expression      >2sigma(I) 
 
_computing_data_collection        'Bruker SMART' 
_computing_cell_refinement        'Bruker SAINT'
_computing_data_reduction         'BRuker SAINT'
_computing_structure_solution     'SHELXS-97 (Sheldrick, 1990)' 
_computing_structure_refinement   'SHELXL-97 (Sheldrick, 1997)' 
_computing_molecular_graphics     'Bruker SHELXTL'
_computing_publication_material   'Bruker SHELXTL'
 
_refine_special_details 
; 
 Refinement of F^2^ against ALL reflections.  The weighted R-factor wR and 
 goodness of fit S are based on F^2^, conventional R-factors R are based 
 on F, with F set to zero for negative F^2^. The threshold expression of 
 F^2^ > 2sigma(F^2^) is used only for calculating R-factors(gt) etc. and is 
 not relevant to the choice of reflections for refinement.  R-factors based 
 on F^2^ are statistically about twice as large as those based on F, and R- 
 factors based on ALL data will be even larger. 
; 
 
_refine_ls_structure_factor_coef  Fsqd  
_refine_ls_matrix_type            full 
_refine_ls_weighting_scheme       calc  
_refine_ls_weighting_details 
 'calc w=1/[\s^2^(Fo^2^)+(0.0586P)^2^+1.0152P] where P=(Fo^2^+2Fc^2^)/3' 
_atom_sites_solution_primary      direct 
_atom_sites_solution_secondary    difmap 
_atom_sites_solution_hydrogens    geom 
_refine_ls_hydrogen_treatment     'Me rigid, others riding'
_refine_ls_extinction_method      none 
_refine_ls_extinction_coef        ? 
_refine_ls_number_reflns          6248 
_refine_ls_number_parameters      344 
_refine_ls_number_restraints      0 
_refine_ls_R_factor_all           0.0479 
_refine_ls_R_factor_gt            0.0406 
_refine_ls_wR_factor_ref          0.1050 
_refine_ls_wR_factor_gt           0.1005 
_refine_ls_goodness_of_fit_ref    1.044 
_refine_ls_restrained_S_all       1.044 
_refine_ls_shift/su_max           0.001 
_refine_ls_shift/su_mean          0.000 
 
loop_ 
 _atom_site_label 
 _atom_site_type_symbol 
 _atom_site_fract_x 
 _atom_site_fract_y 
 _atom_site_fract_z 
 _atom_site_U_iso_or_equiv 
 _atom_site_adp_type 
 _atom_site_occupancy 
 _atom_site_symmetry_multiplicity 
 _atom_site_calc_flag 
 _atom_site_refinement_flags 
 _atom_site_disorder_assembly 
 _atom_site_disorder_group 
P1 P 0.80898(4) 0.043556(19) 0.67932(2) 0.01343(9) Uani 1 1 d . . . 
N1 N 0.70629(13) 0.03128(7) 0.46305(8) 0.0177(3) Uani 1 1 d . . . 
O1 O 0.77061(14) 0.03679(7) 0.09622(8) 0.0310(3) Uani 1 1 d . . . 
C1 C 0.59214(15) 0.14277(8) 0.64354(10) 0.0173(3) Uani 1 1 d . . . 
H1 H 0.6141 0.1489 0.7094 0.021 Uiso 1 1 calc R . . 
C2 C 0.48727(16) 0.18468(8) 0.58905(11) 0.0204(3) Uani 1 1 d . . . 
H2 H 0.4359 0.2187 0.6168 0.025 Uiso 1 1 calc R . . 
C3 C 0.45772(15) 0.17618(8) 0.49201(11) 0.0197(3) Uani 1 1 d . . . 
H3 H 0.3856 0.2048 0.4536 0.024 Uiso 1 1 calc R . . 
C4 C 0.53168(15) 0.12687(8) 0.45130(10) 0.0183(3) Uani 1 1 d . . . 
H4 H 0.5106 0.1228 0.3852 0.022 Uiso 1 1 calc R . . 
C5 C 0.63810(15) 0.08224(8) 0.50544(10) 0.0152(3) Uani 1 1 d . . . 
C6 C 0.78877(15) -0.02589(8) 0.51898(10) 0.0172(3) Uani 1 1 d . . . 
H6A H 0.8350 -0.0558 0.4786 0.021 Uiso 1 1 calc R . . 
H6B H 0.7239 -0.0575 0.5443 0.021 Uiso 1 1 calc R . . 
C7 C 0.90285(15) 0.00482(8) 0.59975(10) 0.0169(3) Uani 1 1 d . . . 
H7A H 0.9600 0.0421 0.5768 0.020 Uiso 1 1 calc R . . 
H7B H 0.9674 -0.0340 0.6306 0.020 Uiso 1 1 calc R . . 
C8 C 0.66763(14) 0.09109(7) 0.60392(10) 0.0143(3) Uani 1 1 d . . . 
C11 C 0.71607(15) 0.03630(8) 0.36791(10) 0.0162(3) Uani 1 1 d . . . 
C12 C 0.75503(15) 0.10037(8) 0.33133(10) 0.0181(3) Uani 1 1 d . . . 
H12 H 0.7692 0.1428 0.3687 0.022 Uiso 1 1 calc R . . 
C13 C 0.77349(16) 0.10287(8) 0.24038(11) 0.0212(3) Uani 1 1 d . . . 
H13 H 0.7984 0.1471 0.2154 0.025 Uiso 1 1 calc R . . 
C14 C 0.75542(17) 0.04058(9) 0.18636(10) 0.0219(3) Uani 1 1 d . . . 
C15 C 0.71808(16) -0.02410(9) 0.22304(10) 0.0216(3) Uani 1 1 d . . . 
H15 H 0.7074 -0.0669 0.1864 0.026 Uiso 1 1 calc R . . 
C16 C 0.69657(16) -0.02602(8) 0.31253(10) 0.0194(3) Uani 1 1 d . . . 
H16 H 0.6684 -0.0699 0.3366 0.023 Uiso 1 1 calc R . . 
C17 C 0.8351(2) 0.09735(11) 0.06251(12) 0.0356(4) Uani 1 1 d . . . 
H17A H 0.7766 0.1405 0.0638 0.043 Uiso 1 1 calc R . . 
H17B H 0.8426 0.0880 -0.0017 0.043 Uiso 1 1 calc R . . 
H17C H 0.9303 0.1052 0.1023 0.043 Uiso 1 1 calc R . . 
C21 C 0.91937(15) 0.10464(8) 0.75846(10) 0.0158(3) Uani 1 1 d . . . 
C22 C 0.97936(16) 0.08412(8) 0.85017(10) 0.0193(3) Uani 1 1 d . . . 
H22 H 0.9551 0.0390 0.8731 0.023 Uiso 1 1 calc R . . 
C23 C 1.07467(16) 0.12989(9) 0.90778(11) 0.0237(3) Uani 1 1 d . . . 
H23 H 1.1152 0.1163 0.9705 0.028 Uiso 1 1 calc R . . 
C24 C 1.11111(16) 0.19552(9) 0.87404(11) 0.0240(3) Uani 1 1 d . . . 
H24 H 1.1761 0.2269 0.9138 0.029 Uiso 1 1 calc R . . 
C25 C 1.05261(18) 0.21538(9) 0.78222(12) 0.0270(4) Uani 1 1 d . . . 
H25 H 1.0790 0.2600 0.7591 0.032 Uiso 1 1 calc R . . 
C26 C 0.95624(17) 0.17063(9) 0.72420(11) 0.0223(3) Uani 1 1 d . . . 
H26 H 0.9155 0.1846 0.6616 0.027 Uiso 1 1 calc R . . 
C31 C 0.75015(15) -0.02688(8) 0.74573(10) 0.0160(3) Uani 1 1 d . . . 
C32 C 0.79292(17) -0.09837(8) 0.74004(11) 0.0218(3) Uani 1 1 d . . . 
H32 H 0.8527 -0.1110 0.6995 0.026 Uiso 1 1 calc R . . 
C33 C 0.74770(19) -0.15112(9) 0.79384(12) 0.0273(4) Uani 1 1 d . . . 
H33 H 0.7759 -0.2000 0.7895 0.033 Uiso 1 1 calc R . . 
C34 C 0.66172(18) -0.13303(9) 0.85383(11) 0.0268(4) Uani 1 1 d . . . 
H34 H 0.6319 -0.1693 0.8908 0.032 Uiso 1 1 calc R . . 
C35 C 0.61926(17) -0.06191(9) 0.85990(11) 0.0258(3) Uani 1 1 d . . . 
H35 H 0.5606 -0.0495 0.9012 0.031 Uiso 1 1 calc R . . 
C36 C 0.66247(16) -0.00901(9) 0.80574(11) 0.0220(3) Uani 1 1 d . . . 
H36 H 0.6324 0.0396 0.8094 0.026 Uiso 1 1 calc R . . 
C99 C 0.97040(18) 0.69938(10) 0.59646(11) 0.0268(3) Uani 1 1 d . . . 
F1 F 1.06885(12) 0.71093(7) 0.67536(7) 0.0403(3) Uani 1 1 d . . . 
F2 F 0.84554(12) 0.68979(7) 0.62024(7) 0.0408(3) Uani 1 1 d . . . 
F3 F 1.00207(13) 0.63725(6) 0.56035(8) 0.0434(3) Uani 1 1 d . . . 
S1 S 0.96037(4) 0.774332(19) 0.51470(3) 0.01806(10) Uani 1 1 d . . . 
O11 O 1.10184(12) 0.77652(6) 0.49823(8) 0.0237(2) Uani 1 1 d . . . 
O12 O 0.85021(13) 0.75234(7) 0.43616(8) 0.0295(3) Uani 1 1 d . . . 
O13 O 0.92593(14) 0.83412(7) 0.56789(10) 0.0358(3) Uani 1 1 d . . . 
 
loop_ 
 _atom_site_aniso_label 
 _atom_site_aniso_U_11 
 _atom_site_aniso_U_22 
 _atom_site_aniso_U_33 
 _atom_site_aniso_U_23 
 _atom_site_aniso_U_13 
 _atom_site_aniso_U_12 
P1 0.01304(17) 0.01348(18) 0.01386(17) 0.00038(13) 0.00326(13) 0.00015(13) 
N1 0.0220(6) 0.0177(6) 0.0137(6) 0.0005(5) 0.0043(5) 0.0051(5) 
O1 0.0435(7) 0.0354(7) 0.0165(5) 0.0021(5) 0.0123(5) 0.0093(6) 
C1 0.0189(7) 0.0168(7) 0.0175(7) -0.0004(5) 0.0068(5) 0.0005(5) 
C2 0.0191(7) 0.0179(7) 0.0260(8) -0.0007(6) 0.0086(6) 0.0030(6) 
C3 0.0150(7) 0.0191(7) 0.0247(7) 0.0047(6) 0.0040(6) 0.0021(5) 
C4 0.0154(7) 0.0214(7) 0.0174(7) 0.0018(6) 0.0021(5) -0.0005(5) 
C5 0.0141(6) 0.0152(6) 0.0167(7) -0.0004(5) 0.0048(5) -0.0013(5) 
C6 0.0195(7) 0.0168(7) 0.0157(6) -0.0005(5) 0.0046(5) 0.0030(5) 
C7 0.0148(6) 0.0193(7) 0.0174(7) -0.0003(5) 0.0055(5) 0.0017(5) 
C8 0.0125(6) 0.0146(6) 0.0157(6) 0.0018(5) 0.0032(5) 0.0003(5) 
C11 0.0142(6) 0.0205(7) 0.0135(6) -0.0009(5) 0.0025(5) 0.0005(5) 
C12 0.0175(7) 0.0179(7) 0.0186(7) -0.0024(5) 0.0034(5) 0.0011(5) 
C13 0.0231(8) 0.0199(7) 0.0220(7) 0.0038(6) 0.0078(6) 0.0035(6) 
C14 0.0219(7) 0.0292(8) 0.0147(7) 0.0005(6) 0.0047(6) 0.0061(6) 
C15 0.0216(7) 0.0237(8) 0.0188(7) -0.0067(6) 0.0032(6) -0.0012(6) 
C16 0.0189(7) 0.0197(7) 0.0196(7) -0.0022(6) 0.0044(6) -0.0033(5) 
C17 0.0412(10) 0.0456(11) 0.0248(8) 0.0138(8) 0.0175(8) 0.0143(9) 
C21 0.0138(6) 0.0165(7) 0.0171(7) -0.0020(5) 0.0035(5) -0.0001(5) 
C22 0.0194(7) 0.0201(7) 0.0183(7) 0.0011(6) 0.0041(6) -0.0004(6) 
C23 0.0203(7) 0.0310(9) 0.0185(7) -0.0034(6) 0.0022(6) -0.0002(6) 
C24 0.0174(7) 0.0252(8) 0.0282(8) -0.0088(6) 0.0029(6) -0.0022(6) 
C25 0.0250(8) 0.0200(8) 0.0344(9) 0.0002(7) 0.0038(7) -0.0063(6) 
C26 0.0231(8) 0.0209(8) 0.0214(7) 0.0025(6) 0.0019(6) -0.0041(6) 
C31 0.0154(7) 0.0158(7) 0.0155(6) 0.0021(5) 0.0013(5) -0.0019(5) 
C32 0.0253(8) 0.0191(7) 0.0204(7) 0.0016(6) 0.0042(6) 0.0014(6) 
C33 0.0343(9) 0.0178(8) 0.0280(8) 0.0047(6) 0.0038(7) -0.0002(6) 
C34 0.0274(8) 0.0267(8) 0.0238(8) 0.0090(6) 0.0010(6) -0.0079(7) 
C35 0.0219(8) 0.0321(9) 0.0253(8) 0.0082(7) 0.0093(6) -0.0013(6) 
C36 0.0207(7) 0.0209(7) 0.0259(8) 0.0036(6) 0.0082(6) 0.0026(6) 
C99 0.0263(8) 0.0315(9) 0.0212(8) 0.0076(7) 0.0028(6) -0.0002(7) 
F1 0.0340(6) 0.0601(8) 0.0223(5) 0.0124(5) -0.0027(4) -0.0022(5) 
F2 0.0344(6) 0.0602(8) 0.0287(5) 0.0123(5) 0.0093(5) -0.0100(5) 
F3 0.0562(7) 0.0196(5) 0.0516(7) 0.0084(5) 0.0067(6) 0.0083(5) 
S1 0.01800(18) 0.01604(18) 0.01932(18) 0.00176(13) 0.00263(14) 0.00369(13) 
O11 0.0208(6) 0.0288(6) 0.0216(5) 0.0022(4) 0.0053(4) 0.0012(4) 
O12 0.0253(6) 0.0354(7) 0.0236(6) 0.0071(5) -0.0030(5) -0.0032(5) 
O13 0.0333(7) 0.0259(6) 0.0491(8) -0.0098(6) 0.0114(6) 0.0078(5) 
 
_geom_special_details 
; 
 All esds (except the esd in the dihedral angle between two l.s. planes) 
 are estimated using the full covariance matrix.  The cell esds are taken 
 into account individually in the estimation of esds in distances, angles 
 and torsion angles; correlations between esds in cell parameters are only 
 used when they are defined by crystal symmetry.  An approximate (isotropic) 
 treatment of cell esds is used for estimating esds involving l.s. planes. 
; 
 
loop_ 
 _geom_bond_atom_site_label_1 
 _geom_bond_atom_site_label_2 
 _geom_bond_distance 
 _geom_bond_site_symmetry_2 
 _geom_bond_publ_flag 
P1 C8 1.7795(14) . ? 
P1 C21 1.7874(14) . ? 
P1 C7 1.7880(14) . ? 
P1 C31 1.7976(14) . ? 
N1 C5 1.3786(18) . ? 
N1 C11 1.4281(18) . ? 
N1 C6 1.4581(18) . ? 
O1 C14 1.3698(18) . ? 
O1 C17 1.425(2) . ? 
C1 C2 1.376(2) . ? 
C1 C8 1.4075(19) . ? 
C2 C3 1.399(2) . ? 
C3 C4 1.378(2) . ? 
C4 C5 1.412(2) . ? 
C5 C8 1.4205(19) . ? 
C6 C7 1.531(2) . ? 
C11 C12 1.389(2) . ? 
C11 C16 1.399(2) . ? 
C12 C13 1.391(2) . ? 
C13 C14 1.388(2) . ? 
C14 C15 1.394(2) . ? 
C15 C16 1.380(2) . ? 
C21 C22 1.393(2) . ? 
C21 C26 1.398(2) . ? 
C22 C23 1.386(2) . ? 
C23 C24 1.387(2) . ? 
C24 C25 1.388(2) . ? 
C25 C26 1.383(2) . ? 
C31 C32 1.393(2) . ? 
C31 C36 1.397(2) . ? 
C32 C33 1.389(2) . ? 
C33 C34 1.386(3) . ? 
C34 C35 1.387(2) . ? 
C35 C36 1.386(2) . ? 
C99 F3 1.331(2) . ? 
C99 F1 1.3370(19) . ? 
C99 F2 1.343(2) . ? 
C99 S1 1.8234(17) . ? 
S1 O12 1.4368(12) . ? 
S1 O13 1.4375(12) . ? 
S1 O11 1.4420(12) . ? 
 
loop_ 
 _geom_angle_atom_site_label_1 
 _geom_angle_atom_site_label_2 
 _geom_angle_atom_site_label_3 
 _geom_angle 
 _geom_angle_site_symmetry_1 
 _geom_angle_site_symmetry_3 
 _geom_angle_publ_flag 
C8 P1 C21 110.49(7) . . ? 
C8 P1 C7 102.79(7) . . ? 
C21 P1 C7 111.33(7) . . ? 
C8 P1 C31 113.82(7) . . ? 
C21 P1 C31 108.63(7) . . ? 
C7 P1 C31 109.73(7) . . ? 
C5 N1 C11 123.09(12) . . ? 
C5 N1 C6 119.72(12) . . ? 
C11 N1 C6 116.70(11) . . ? 
C14 O1 C17 116.76(14) . . ? 
C2 C1 C8 121.51(13) . . ? 
C1 C2 C3 118.72(14) . . ? 
C4 C3 C2 120.96(14) . . ? 
C3 C4 C5 121.61(14) . . ? 
N1 C5 C4 120.37(13) . . ? 
N1 C5 C8 122.43(13) . . ? 
C4 C5 C8 117.18(13) . . ? 
N1 C6 C7 111.75(12) . . ? 
C6 C7 P1 105.93(10) . . ? 
C1 C8 C5 120.00(13) . . ? 
C1 C8 P1 118.23(11) . . ? 
C5 C8 P1 121.57(10) . . ? 
C12 C11 C16 119.27(13) . . ? 
C12 C11 N1 121.39(13) . . ? 
C16 C11 N1 119.16(13) . . ? 
C11 C12 C13 120.52(14) . . ? 
C14 C13 C12 119.77(14) . . ? 
O1 C14 C13 124.75(15) . . ? 
O1 C14 C15 115.25(14) . . ? 
C13 C14 C15 120.00(14) . . ? 
C16 C15 C14 120.08(14) . . ? 
C15 C16 C11 120.33(14) . . ? 
C22 C21 C26 120.26(13) . . ? 
C22 C21 P1 120.74(11) . . ? 
C26 C21 P1 118.68(11) . . ? 
C23 C22 C21 119.67(14) . . ? 
C22 C23 C24 120.18(14) . . ? 
C23 C24 C25 120.01(14) . . ? 
C26 C25 C24 120.47(15) . . ? 
C25 C26 C21 119.40(14) . . ? 
C32 C31 C36 119.59(14) . . ? 
C32 C31 P1 121.30(11) . . ? 
C36 C31 P1 119.09(11) . . ? 
C33 C32 C31 119.70(15) . . ? 
C34 C33 C32 120.49(15) . . ? 
C33 C34 C35 119.98(15) . . ? 
C36 C35 C34 119.98(15) . . ? 
C35 C36 C31 120.24(15) . . ? 
F3 C99 F1 107.58(14) . . ? 
F3 C99 F2 107.05(14) . . ? 
F1 C99 F2 107.20(13) . . ? 
F3 C99 S1 112.01(11) . . ? 
F1 C99 S1 111.74(12) . . ? 
F2 C99 S1 111.01(12) . . ? 
O12 S1 O13 115.75(8) . . ? 
O12 S1 O11 115.25(7) . . ? 
O13 S1 O11 114.67(8) . . ? 
O12 S1 C99 103.43(8) . . ? 
O13 S1 C99 102.06(8) . . ? 
O11 S1 C99 102.97(7) . . ? 
 
loop_ 
 _geom_torsion_atom_site_label_1 
 _geom_torsion_atom_site_label_2 
 _geom_torsion_atom_site_label_3 
 _geom_torsion_atom_site_label_4 
 _geom_torsion 
 _geom_torsion_site_symmetry_1 
 _geom_torsion_site_symmetry_2 
 _geom_torsion_site_symmetry_3 
 _geom_torsion_site_symmetry_4 
 _geom_torsion_publ_flag 
C8 C1 C2 C3 -1.2(2) . . . . ? 
C1 C2 C3 C4 0.1(2) . . . . ? 
C2 C3 C4 C5 1.1(2) . . . . ? 
C11 N1 C5 C4 23.5(2) . . . . ? 
C6 N1 C5 C4 -164.78(13) . . . . ? 
C11 N1 C5 C8 -158.30(13) . . . . ? 
C6 N1 C5 C8 13.5(2) . . . . ? 
C3 C4 C5 N1 177.30(14) . . . . ? 
C3 C4 C5 C8 -1.0(2) . . . . ? 
C5 N1 C6 C7 -55.62(17) . . . . ? 
C11 N1 C6 C7 116.64(13) . . . . ? 
N1 C6 C7 P1 69.29(13) . . . . ? 
C8 P1 C7 C6 -44.20(11) . . . . ? 
C21 P1 C7 C6 -162.49(9) . . . . ? 
C31 P1 C7 C6 77.22(11) . . . . ? 
C2 C1 C8 C5 1.2(2) . . . . ? 
C2 C1 C8 P1 176.06(12) . . . . ? 
N1 C5 C8 C1 -178.37(13) . . . . ? 
C4 C5 C8 C1 -0.1(2) . . . . ? 
N1 C5 C8 P1 6.95(19) . . . . ? 
C4 C5 C8 P1 -174.77(10) . . . . ? 
C21 P1 C8 C1 -45.67(13) . . . . ? 
C7 P1 C8 C1 -164.56(11) . . . . ? 
C31 P1 C8 C1 76.85(13) . . . . ? 
C21 P1 C8 C5 129.10(12) . . . . ? 
C7 P1 C8 C5 10.21(13) . . . . ? 
C31 P1 C8 C5 -108.38(12) . . . . ? 
C5 N1 C11 C12 46.6(2) . . . . ? 
C6 N1 C11 C12 -125.39(15) . . . . ? 
C5 N1 C11 C16 -138.35(15) . . . . ? 
C6 N1 C11 C16 49.67(18) . . . . ? 
C16 C11 C12 C13 0.5(2) . . . . ? 
N1 C11 C12 C13 175.56(13) . . . . ? 
C11 C12 C13 C14 -1.2(2) . . . . ? 
C17 O1 C14 C13 12.4(2) . . . . ? 
C17 O1 C14 C15 -168.12(14) . . . . ? 
C12 C13 C14 O1 179.89(14) . . . . ? 
C12 C13 C14 C15 0.4(2) . . . . ? 
O1 C14 C15 C16 -178.40(14) . . . . ? 
C13 C14 C15 C16 1.1(2) . . . . ? 
C14 C15 C16 C11 -1.9(2) . . . . ? 
C12 C11 C16 C15 1.0(2) . . . . ? 
N1 C11 C16 C15 -174.13(13) . . . . ? 
C8 P1 C21 C22 143.50(12) . . . . ? 
C7 P1 C21 C22 -102.95(13) . . . . ? 
C31 P1 C21 C22 17.99(14) . . . . ? 
C8 P1 C21 C26 -42.92(14) . . . . ? 
C7 P1 C21 C26 70.63(13) . . . . ? 
C31 P1 C21 C26 -168.44(12) . . . . ? 
C26 C21 C22 C23 0.8(2) . . . . ? 
P1 C21 C22 C23 174.25(11) . . . . ? 
C21 C22 C23 C24 -0.6(2) . . . . ? 
C22 C23 C24 C25 -0.3(2) . . . . ? 
C23 C24 C25 C26 1.0(3) . . . . ? 
C24 C25 C26 C21 -0.8(3) . . . . ? 
C22 C21 C26 C25 -0.1(2) . . . . ? 
P1 C21 C26 C25 -173.71(13) . . . . ? 
C8 P1 C31 C32 122.21(12) . . . . ? 
C21 P1 C31 C32 -114.25(13) . . . . ? 
C7 P1 C31 C32 7.67(14) . . . . ? 
C8 P1 C31 C36 -59.28(14) . . . . ? 
C21 P1 C31 C36 64.27(13) . . . . ? 
C7 P1 C31 C36 -173.82(12) . . . . ? 
C36 C31 C32 C33 0.2(2) . . . . ? 
P1 C31 C32 C33 178.67(12) . . . . ? 
C31 C32 C33 C34 -0.7(2) . . . . ? 
C32 C33 C34 C35 0.5(3) . . . . ? 
C33 C34 C35 C36 0.2(3) . . . . ? 
C34 C35 C36 C31 -0.7(2) . . . . ? 
C32 C31 C36 C35 0.6(2) . . . . ? 
P1 C31 C36 C35 -177.98(12) . . . . ? 
F3 C99 S1 O12 59.55(14) . . . . ? 
F1 C99 S1 O12 -179.66(12) . . . . ? 
F2 C99 S1 O12 -60.05(13) . . . . ? 
F3 C99 S1 O13 -179.93(12) . . . . ? 
F1 C99 S1 O13 -59.15(14) . . . . ? 
F2 C99 S1 O13 60.47(13) . . . . ? 
F3 C99 S1 O11 -60.78(13) . . . . ? 
F1 C99 S1 O11 60.01(13) . . . . ? 
F2 C99 S1 O11 179.62(11) . . . . ? 
 
loop_ 
 _geom_hbond_atom_site_label_D 
 _geom_hbond_atom_site_label_H 
 _geom_hbond_atom_site_label_A 
 _geom_hbond_distance_DH 
 _geom_hbond_distance_HA 
 _geom_hbond_distance_DA 
 _geom_hbond_angle_DHA 
 _geom_hbond_site_symmetry_A 
C12 H12 O11  0.95 2.55 3.4326(19) 155.3 3_766 
C26 H26 O11  0.95 2.43 3.3373(19) 160.1 3_766 
C24 H24 O11  0.95 2.42 3.3243(19) 160.1 2_746 
C17 H17A O12  0.98 2.40 3.381(2) 175.0 2_645 
C32 H32 O13  0.95 2.43 3.336(2) 158.9 1_545 
 
_diffrn_measured_fraction_theta_max    0.948 
_diffrn_reflns_theta_full              26.00 
_diffrn_measured_fraction_theta_full   1.000 
_refine_diff_density_max    0.534 
_refine_diff_density_min   -0.325 
_refine_diff_density_rms    0.063 


#===END

 
data_rrm115s_compound_3k 
 
_audit_creation_method            SHELXL-97 
_chemical_name_systematic 
; 
 ? 
; 
_chemical_name_common             ? 
_chemical_melting_point           ? 
_chemical_formula_moiety          ? 
_chemical_formula_sum 
 'C29 H27 F3 N O4 P S' 
_chemical_formula_weight          573.55 
 
loop_ 
 _atom_type_symbol 
 _atom_type_description 
 _atom_type_scat_dispersion_real 
 _atom_type_scat_dispersion_imag 
 _atom_type_scat_source 
 'C'  'C'   0.0033   0.0016 
 'International Tables Vol C Tables 4.2.6.8 and 6.1.1.4' 
 'H'  'H'   0.0000   0.0000 
 'International Tables Vol C Tables 4.2.6.8 and 6.1.1.4' 
 'N'  'N'   0.0061   0.0033 
 'International Tables Vol C Tables 4.2.6.8 and 6.1.1.4' 
 'O'  'O'   0.0106   0.0060 
 'International Tables Vol C Tables 4.2.6.8 and 6.1.1.4' 
 'F'  'F'   0.0171   0.0103 
 'International Tables Vol C Tables 4.2.6.8 and 6.1.1.4' 
 'P'  'P'   0.1023   0.0942 
 'International Tables Vol C Tables 4.2.6.8 and 6.1.1.4' 
 'S'  'S'   0.1246   0.1234 
 'International Tables Vol C Tables 4.2.6.8 and 6.1.1.4' 
 
_symmetry_cell_setting            Monoclinic 
_symmetry_space_group_name_H-M    'P2 1/n'
 
loop_ 
 _symmetry_equiv_pos_as_xyz 
 'x, y, z' 
 '-x+1/2, y+1/2, -z+1/2' 
 '-x, -y, -z' 
 'x-1/2, -y-1/2, z-1/2' 
 
_cell_length_a                    13.3873(13) 
_cell_length_b                    12.8784(12) 
_cell_length_c                    15.8361(15) 
_cell_angle_alpha                 90.00 
_cell_angle_beta                  102.499(2) 
_cell_angle_gamma                 90.00 
_cell_volume                      2665.5(4) 
_cell_formula_units_Z             4 
_cell_measurement_temperature     100(2) 
_cell_measurement_reflns_used     5976
_cell_measurement_theta_min       2.25
_cell_measurement_theta_max       28.58
 
_exptl_crystal_description        needle
_exptl_crystal_colour             colourless
_exptl_crystal_size_max           0.34 
_exptl_crystal_size_mid           0.08 
_exptl_crystal_size_min           0.07 
_exptl_crystal_density_meas       ? 
_exptl_crystal_density_diffrn     1.429 
_exptl_crystal_density_method     'not measured' 
_exptl_crystal_F_000              1192 
_exptl_absorpt_coefficient_mu     0.240 
_exptl_absorpt_correction_type    multi-scan
_exptl_absorpt_correction_T_min   0.8691 
_exptl_absorpt_correction_T_max   0.9834 
_exptl_absorpt_process_details    SADABS 
 
_exptl_special_details 
; 
 ? 
; 
 
_diffrn_ambient_temperature       100(2) 
_diffrn_radiation_wavelength      0.71073 
_diffrn_radiation_type            MoK\a 
_diffrn_radiation_source          'fine-focus sealed tube' 
_diffrn_radiation_monochromator   graphite 
_diffrn_measurement_device_type   'Bruker SMART APEX CCD'
_diffrn_measurement_method        \w-scan
_diffrn_detector_area_resol_mean  8.26
_diffrn_standards_number          ? 
_diffrn_standards_interval_count  ? 
_diffrn_standards_interval_time   ? 
_diffrn_standards_decay_%         ? 
_diffrn_reflns_number             32125 
_diffrn_reflns_av_R_equivalents   0.0336 
_diffrn_reflns_av_sigmaI/netI     0.0278 
_diffrn_reflns_limit_h_min        -17 
_diffrn_reflns_limit_h_max        17 
_diffrn_reflns_limit_k_min        -16 
_diffrn_reflns_limit_k_max        16 
_diffrn_reflns_limit_l_min        -21 
_diffrn_reflns_limit_l_max        21 
_diffrn_reflns_theta_min          1.81 
_diffrn_reflns_theta_max          28.72 
_reflns_number_total              6487 
_reflns_number_gt                 6251 
_reflns_threshold_expression      >2sigma(I) 
 
_computing_data_collection        'Bruker SMART'
_computing_cell_refinement        'Bruker SAINT'
_computing_data_reduction         'Bruker SAINT'
_computing_structure_solution     'SHELXS-97 (Sheldrick, 1990)' 
_computing_structure_refinement   'SHELXL-97 (Sheldrick, 1997)' 
_computing_molecular_graphics     'Bruker SHELXTL'
_computing_publication_material   'Bruker SHELXTL'
 
_refine_special_details 
; 
 Refinement of F^2^ against ALL reflections.  The weighted R-factor wR and 
 goodness of fit S are based on F^2^, conventional R-factors R are based 
 on F, with F set to zero for negative F^2^. The threshold expression of 
 F^2^ > 2sigma(F^2^) is used only for calculating R-factors(gt) etc. and is 
 not relevant to the choice of reflections for refinement.  R-factors based 
 on F^2^ are statistically about twice as large as those based on F, and R- 
 factors based on ALL data will be even larger. 
; 
 
_refine_ls_structure_factor_coef  Fsqd  
_refine_ls_matrix_type            full 
_refine_ls_weighting_scheme       calc  
_refine_ls_weighting_details 
 'calc w=1/[\s^2^(Fo^2^)+(0.0320P)^2^+3.8270P] where P=(Fo^2^+2Fc^2^)/3' 
_atom_sites_solution_primary      direct 
_atom_sites_solution_secondary    difmap 
_atom_sites_solution_hydrogens    geom 
_refine_ls_hydrogen_treatment     'Me rigid others riding'
_refine_ls_extinction_method      none 
_refine_ls_extinction_coef        ? 
_refine_ls_number_reflns          6487 
_refine_ls_number_parameters      354 
_refine_ls_number_restraints      0 
_refine_ls_R_factor_all           0.0655 
_refine_ls_R_factor_gt            0.0627 
_refine_ls_wR_factor_ref          0.1305 
_refine_ls_wR_factor_gt           0.1291 
_refine_ls_goodness_of_fit_ref    1.269 
_refine_ls_restrained_S_all       1.269 
_refine_ls_shift/su_max           0.001 
_refine_ls_shift/su_mean          0.000 
 
loop_ 
 _atom_site_label 
 _atom_site_type_symbol 
 _atom_site_fract_x 
 _atom_site_fract_y 
 _atom_site_fract_z 
 _atom_site_U_iso_or_equiv 
 _atom_site_adp_type 
 _atom_site_occupancy 
 _atom_site_symmetry_multiplicity 
 _atom_site_calc_flag 
 _atom_site_refinement_flags 
 _atom_site_disorder_assembly 
 _atom_site_disorder_group 
P1 P 0.88753(4) 0.74958(4) 1.08183(4) 0.01312(13) Uani 1 1 d . . . 
N1 N 0.90786(15) 0.84600(15) 0.90618(12) 0.0173(4) Uani 1 1 d . . . 
O1 O 0.84920(13) 0.53662(12) 1.05313(11) 0.0199(3) Uani 1 1 d . . . 
C1 C 0.86742(17) 0.57668(17) 0.97871(15) 0.0159(4) Uani 1 1 d . . . 
C2 C 0.86862(18) 0.52071(18) 0.90466(15) 0.0192(5) Uani 1 1 d . . . 
H2 H 0.8589 0.4476 0.9029 0.023 Uiso 1 1 calc R . . 
C3 C 0.88453(18) 0.57474(19) 0.83254(15) 0.0199(5) Uani 1 1 d . . . 
H3 H 0.8855 0.5371 0.7811 0.024 Uiso 1 1 calc R . . 
C4 C 0.89892(17) 0.68070(18) 0.83279(15) 0.0181(4) Uani 1 1 d . . . 
H4 H 0.9092 0.7144 0.7820 0.022 Uiso 1 1 calc R . . 
C5 C 0.89845(16) 0.73921(17) 0.90764(14) 0.0158(4) Uani 1 1 d . . . 
C6 C 0.88378(16) 0.68561(17) 0.98219(14) 0.0148(4) Uani 1 1 d . . . 
C7 C 0.93235(17) 0.87685(17) 1.06279(14) 0.0162(4) Uani 1 1 d . . . 
H7A H 0.9177 0.9264 1.1064 0.019 Uiso 1 1 calc R . . 
H7B H 1.0071 0.8757 1.0665 0.019 Uiso 1 1 calc R . . 
C8 C 0.87596(18) 0.90924(17) 0.97206(14) 0.0169(4) Uani 1 1 d . . . 
H8A H 0.8013 0.9015 0.9670 0.020 Uiso 1 1 calc R . . 
H8B H 0.8903 0.9832 0.9626 0.020 Uiso 1 1 calc R . . 
C9 C 0.8349(2) 0.42612(19) 1.05563(17) 0.0279(6) Uani 1 1 d . . . 
H9A H 0.7751 0.4061 1.0110 0.033 Uiso 1 1 calc R . . 
H9B H 0.8239 0.4061 1.1126 0.033 Uiso 1 1 calc R . . 
H9C H 0.8958 0.3908 1.0449 0.033 Uiso 1 1 calc R . . 
C11 C 0.97004(17) 0.69567(17) 1.17652(14) 0.0150(4) Uani 1 1 d . . . 
C12 C 0.92953(19) 0.6313(2) 1.23189(15) 0.0216(5) Uani 1 1 d . . . 
H12 H 0.8595 0.6118 1.2173 0.026 Uiso 1 1 calc R . . 
C13 C 0.9918(2) 0.5960(2) 1.30808(16) 0.0254(5) Uani 1 1 d . . . 
H13 H 0.9646 0.5517 1.3455 0.030 Uiso 1 1 calc R . . 
C14 C 1.0933(2) 0.6253(2) 1.32949(17) 0.0286(6) Uani 1 1 d . . . 
H14 H 1.1353 0.6023 1.3824 0.034 Uiso 1 1 calc R . . 
C15 C 1.1343(2) 0.6878(2) 1.27489(19) 0.0296(6) Uani 1 1 d . . . 
H15 H 1.2044 0.7069 1.2900 0.036 Uiso 1 1 calc R . . 
C16 C 1.07277(18) 0.72318(18) 1.19730(17) 0.0217(5) Uani 1 1 d . . . 
H16 H 1.1010 0.7656 1.1592 0.026 Uiso 1 1 calc R . . 
C21 C 0.76233(16) 0.76275(17) 1.10434(14) 0.0153(4) Uani 1 1 d . . . 
C22 C 0.67595(17) 0.71910(19) 1.05091(16) 0.0196(5) Uani 1 1 d . . . 
H22 H 0.6826 0.6790 1.0021 0.024 Uiso 1 1 calc R . . 
C23 C 0.58011(18) 0.7345(2) 1.06939(17) 0.0246(5) Uani 1 1 d . . . 
H23 H 0.5213 0.7039 1.0337 0.030 Uiso 1 1 calc R . . 
C24 C 0.57044(19) 0.7940(2) 1.13954(16) 0.0243(5) Uani 1 1 d . . . 
H24 H 0.5048 0.8051 1.1516 0.029 Uiso 1 1 calc R . . 
C25 C 0.65584(19) 0.8377(2) 1.19242(16) 0.0259(5) Uani 1 1 d . . . 
H25 H 0.6485 0.8786 1.2406 0.031 Uiso 1 1 calc R . . 
C26 C 0.75195(18) 0.8223(2) 1.17558(15) 0.0221(5) Uani 1 1 d . . . 
H26 H 0.8105 0.8521 1.2123 0.027 Uiso 1 1 calc R . . 
C31 C 0.93995(18) 0.89793(17) 0.83670(14) 0.0165(4) Uani 1 1 d . . . 
C32 C 0.87654(18) 0.97105(18) 0.78770(15) 0.0204(5) Uani 1 1 d . . . 
H32 H 0.8111 0.9853 0.7991 0.025 Uiso 1 1 calc R . . 
C33 C 0.9093(2) 1.0233(2) 0.72191(16) 0.0248(5) Uani 1 1 d . . . 
H33 H 0.8658 1.0737 0.6888 0.030 Uiso 1 1 calc R . . 
C34 C 1.0045(2) 1.00345(19) 0.70355(15) 0.0236(5) Uani 1 1 d . . . 
C35 C 1.0671(2) 0.9304(2) 0.75383(16) 0.0229(5) Uani 1 1 d . . . 
H35 H 1.1326 0.9160 0.7425 0.027 Uiso 1 1 calc R . . 
C36 C 1.03586(18) 0.87800(18) 0.82029(15) 0.0197(5) Uani 1 1 d . . . 
H36 H 1.0799 0.8288 0.8543 0.024 Uiso 1 1 calc R . . 
C37 C 1.0374(3) 1.0598(2) 0.63029(18) 0.0364(7) Uani 1 1 d . . . 
H37A H 1.1083 1.0413 0.6297 0.044 Uiso 1 1 calc R . . 
H37B H 1.0326 1.1349 0.6385 0.044 Uiso 1 1 calc R . . 
H37C H 0.9928 1.0398 0.5752 0.044 Uiso 1 1 calc R . . 
S1 S 0.27013(4) 0.82499(4) 1.05928(4) 0.01763(13) Uani 1 1 d . . . 
O2 O 0.16127(13) 0.81433(15) 1.02694(12) 0.0268(4) Uani 1 1 d . . . 
O3 O 0.32491(14) 0.72938(14) 1.08113(13) 0.0289(4) Uani 1 1 d . . . 
O4 O 0.29995(16) 0.90833(15) 1.11963(12) 0.0308(4) Uani 1 1 d . . . 
C41 C 0.3138(2) 0.8701(2) 0.96411(17) 0.0257(5) Uani 1 1 d . . . 
F1 F 0.29783(15) 0.79966(16) 0.90128(11) 0.0456(5) Uani 1 1 d . . . 
F2 F 0.26529(13) 0.95637(13) 0.93133(11) 0.0354(4) Uani 1 1 d . . . 
F3 F 0.41338(13) 0.89242(17) 0.98407(12) 0.0467(5) Uani 1 1 d . . . 
 
loop_ 
 _atom_site_aniso_label 
 _atom_site_aniso_U_11 
 _atom_site_aniso_U_22 
 _atom_site_aniso_U_33 
 _atom_site_aniso_U_23 
 _atom_site_aniso_U_13 
 _atom_site_aniso_U_12 
P1 0.0126(3) 0.0140(3) 0.0123(3) -0.0017(2) 0.00160(19) -0.0006(2) 
N1 0.0228(10) 0.0157(9) 0.0148(9) -0.0015(7) 0.0069(8) 0.0006(8) 
O1 0.0284(9) 0.0138(7) 0.0173(8) 0.0012(6) 0.0042(7) -0.0023(7) 
C1 0.0146(10) 0.0149(10) 0.0181(11) -0.0003(8) 0.0033(8) 0.0011(8) 
C2 0.0204(11) 0.0136(10) 0.0225(12) -0.0032(9) 0.0026(9) 0.0003(9) 
C3 0.0213(11) 0.0204(11) 0.0171(11) -0.0064(9) 0.0021(9) 0.0017(9) 
C4 0.0187(11) 0.0214(11) 0.0139(10) -0.0008(9) 0.0028(8) 0.0007(9) 
C5 0.0132(10) 0.0167(10) 0.0165(10) -0.0009(8) 0.0013(8) 0.0023(8) 
C6 0.0147(10) 0.0161(10) 0.0131(10) -0.0052(8) 0.0018(8) 0.0003(8) 
C7 0.0159(10) 0.0148(10) 0.0182(11) -0.0020(8) 0.0045(8) -0.0022(8) 
C8 0.0208(11) 0.0137(10) 0.0161(10) -0.0017(8) 0.0039(9) 0.0027(8) 
C9 0.0439(16) 0.0163(11) 0.0220(12) 0.0019(9) 0.0041(11) -0.0064(11) 
C11 0.0164(10) 0.0143(10) 0.0132(10) -0.0028(8) 0.0012(8) 0.0039(8) 
C12 0.0182(11) 0.0270(12) 0.0189(11) 0.0003(9) 0.0029(9) 0.0032(9) 
C13 0.0324(14) 0.0266(13) 0.0181(12) 0.0046(10) 0.0076(10) 0.0098(11) 
C14 0.0341(14) 0.0233(12) 0.0217(12) -0.0039(10) -0.0086(10) 0.0115(11) 
C15 0.0198(12) 0.0228(12) 0.0390(15) -0.0041(11) -0.0096(11) 0.0027(10) 
C16 0.0173(11) 0.0177(11) 0.0282(13) -0.0014(9) 0.0007(9) -0.0002(9) 
C21 0.0139(10) 0.0159(10) 0.0158(10) 0.0028(8) 0.0027(8) 0.0015(8) 
C22 0.0157(11) 0.0208(11) 0.0207(11) -0.0032(9) 0.0003(9) 0.0024(9) 
C23 0.0147(11) 0.0288(13) 0.0288(13) -0.0029(10) 0.0012(9) -0.0018(10) 
C24 0.0175(11) 0.0324(13) 0.0244(12) 0.0048(10) 0.0073(9) 0.0056(10) 
C25 0.0229(12) 0.0371(14) 0.0180(11) -0.0045(10) 0.0051(9) 0.0067(11) 
C26 0.0181(11) 0.0290(13) 0.0178(11) -0.0058(10) 0.0007(9) 0.0003(10) 
C31 0.0211(11) 0.0143(10) 0.0134(10) -0.0018(8) 0.0026(8) -0.0030(8) 
C32 0.0192(11) 0.0194(11) 0.0209(12) -0.0008(9) 0.0004(9) 0.0000(9) 
C33 0.0299(13) 0.0220(12) 0.0201(12) 0.0030(10) -0.0002(10) -0.0020(10) 
C34 0.0333(14) 0.0221(12) 0.0153(11) -0.0008(9) 0.0054(10) -0.0084(10) 
C35 0.0249(12) 0.0251(12) 0.0200(12) -0.0067(10) 0.0077(9) -0.0066(10) 
C36 0.0208(11) 0.0189(11) 0.0176(11) -0.0023(9) 0.0001(9) -0.0020(9) 
C37 0.0500(18) 0.0372(16) 0.0236(14) 0.0039(12) 0.0115(13) -0.0119(14) 
S1 0.0161(3) 0.0188(3) 0.0178(3) -0.0003(2) 0.0031(2) -0.0008(2) 
O2 0.0160(8) 0.0340(10) 0.0300(10) 0.0010(8) 0.0042(7) -0.0009(7) 
O3 0.0255(9) 0.0208(9) 0.0371(11) 0.0053(8) -0.0002(8) 0.0008(7) 
O4 0.0386(11) 0.0286(10) 0.0234(9) -0.0073(8) 0.0024(8) -0.0008(8) 
C41 0.0208(12) 0.0345(14) 0.0223(12) 0.0040(10) 0.0058(10) 0.0045(10) 
F1 0.0569(12) 0.0574(12) 0.0257(9) -0.0110(8) 0.0163(8) 0.0107(10) 
F2 0.0351(9) 0.0381(9) 0.0321(9) 0.0151(7) 0.0054(7) 0.0037(7) 
F3 0.0208(8) 0.0784(14) 0.0413(10) 0.0236(10) 0.0077(7) -0.0043(9) 
 
_geom_special_details 
; 
 All esds (except the esd in the dihedral angle between two l.s. planes) 
 are estimated using the full covariance matrix.  The cell esds are taken 
 into account individually in the estimation of esds in distances, angles 
 and torsion angles; correlations between esds in cell parameters are only 
 used when they are defined by crystal symmetry.  An approximate (isotropic) 
 treatment of cell esds is used for estimating esds involving l.s. planes. 
; 
 
loop_ 
 _geom_bond_atom_site_label_1 
 _geom_bond_atom_site_label_2 
 _geom_bond_distance 
 _geom_bond_site_symmetry_2 
 _geom_bond_publ_flag 
P1 C6 1.771(2) . ? 
P1 C7 1.793(2) . ? 
P1 C21 1.795(2) . ? 
P1 C11 1.798(2) . ? 
N1 C5 1.382(3) . ? 
N1 C31 1.431(3) . ? 
N1 C8 1.458(3) . ? 
O1 C1 1.356(3) . ? 
O1 C9 1.438(3) . ? 
C1 C2 1.380(3) . ? 
C1 C6 1.419(3) . ? 
C2 C3 1.393(3) . ? 
C3 C4 1.378(3) . ? 
C4 C5 1.406(3) . ? 
C5 C6 1.417(3) . ? 
C7 C8 1.529(3) . ? 
C11 C16 1.389(3) . ? 
C11 C12 1.399(3) . ? 
C12 C13 1.386(3) . ? 
C13 C14 1.380(4) . ? 
C14 C15 1.379(4) . ? 
C15 C16 1.399(4) . ? 
C21 C22 1.395(3) . ? 
C21 C26 1.396(3) . ? 
C22 C23 1.391(3) . ? 
C23 C24 1.379(4) . ? 
C24 C25 1.382(4) . ? 
C25 C26 1.384(3) . ? 
C31 C32 1.387(3) . ? 
C31 C36 1.388(3) . ? 
C32 C33 1.389(3) . ? 
C33 C34 1.391(4) . ? 
C34 C35 1.390(4) . ? 
C34 C37 1.513(4) . ? 
C35 C36 1.389(3) . ? 
S1 O4 1.4351(19) . ? 
S1 O3 1.4366(19) . ? 
S1 O2 1.4429(18) . ? 
S1 C41 1.825(3) . ? 
C41 F1 1.329(3) . ? 
C41 F3 1.333(3) . ? 
C41 F2 1.334(3) . ? 
 
loop_ 
 _geom_angle_atom_site_label_1 
 _geom_angle_atom_site_label_2 
 _geom_angle_atom_site_label_3 
 _geom_angle 
 _geom_angle_site_symmetry_1 
 _geom_angle_site_symmetry_3 
 _geom_angle_publ_flag 
C6 P1 C7 102.79(11) . . ? 
C6 P1 C21 111.91(10) . . ? 
C7 P1 C21 107.92(10) . . ? 
C6 P1 C11 117.21(10) . . ? 
C7 P1 C11 109.01(11) . . ? 
C21 P1 C11 107.60(10) . . ? 
C5 N1 C31 121.45(19) . . ? 
C5 N1 C8 120.14(19) . . ? 
C31 N1 C8 118.18(18) . . ? 
C1 O1 C9 116.79(19) . . ? 
O1 C1 C2 125.3(2) . . ? 
O1 C1 C6 113.43(19) . . ? 
C2 C1 C6 121.3(2) . . ? 
C1 C2 C3 117.9(2) . . ? 
C4 C3 C2 122.6(2) . . ? 
C3 C4 C5 120.5(2) . . ? 
N1 C5 C4 120.2(2) . . ? 
N1 C5 C6 121.9(2) . . ? 
C4 C5 C6 117.9(2) . . ? 
C5 C6 C1 119.8(2) . . ? 
C5 C6 P1 122.22(17) . . ? 
C1 C6 P1 117.96(17) . . ? 
C8 C7 P1 106.99(15) . . ? 
N1 C8 C7 111.00(18) . . ? 
C16 C11 C12 120.1(2) . . ? 
C16 C11 P1 119.81(18) . . ? 
C12 C11 P1 120.00(17) . . ? 
C13 C12 C11 119.9(2) . . ? 
C14 C13 C12 119.9(2) . . ? 
C15 C14 C13 120.7(2) . . ? 
C14 C15 C16 120.2(2) . . ? 
C11 C16 C15 119.3(2) . . ? 
C22 C21 C26 119.8(2) . . ? 
C22 C21 P1 121.91(18) . . ? 
C26 C21 P1 118.22(17) . . ? 
C23 C22 C21 119.8(2) . . ? 
C24 C23 C22 120.0(2) . . ? 
C23 C24 C25 120.3(2) . . ? 
C24 C25 C26 120.4(2) . . ? 
C25 C26 C21 119.6(2) . . ? 
C32 C31 C36 120.0(2) . . ? 
C32 C31 N1 119.9(2) . . ? 
C36 C31 N1 120.1(2) . . ? 
C31 C32 C33 119.6(2) . . ? 
C32 C33 C34 121.4(2) . . ? 
C35 C34 C33 118.1(2) . . ? 
C35 C34 C37 121.6(3) . . ? 
C33 C34 C37 120.3(2) . . ? 
C36 C35 C34 121.3(2) . . ? 
C31 C36 C35 119.7(2) . . ? 
O4 S1 O3 115.25(12) . . ? 
O4 S1 O2 114.93(12) . . ? 
O3 S1 O2 115.32(11) . . ? 
O4 S1 C41 102.67(13) . . ? 
O3 S1 C41 103.51(12) . . ? 
O2 S1 C41 102.51(11) . . ? 
F1 C41 F3 108.4(2) . . ? 
F1 C41 F2 106.9(2) . . ? 
F3 C41 F2 106.9(2) . . ? 
F1 C41 S1 111.89(19) . . ? 
F3 C41 S1 110.82(18) . . ? 
F2 C41 S1 111.74(18) . . ? 
 
loop_ 
 _geom_torsion_atom_site_label_1 
 _geom_torsion_atom_site_label_2 
 _geom_torsion_atom_site_label_3 
 _geom_torsion_atom_site_label_4 
 _geom_torsion 
 _geom_torsion_site_symmetry_1 
 _geom_torsion_site_symmetry_2 
 _geom_torsion_site_symmetry_3 
 _geom_torsion_site_symmetry_4 
 _geom_torsion_publ_flag 
C9 O1 C1 C2 3.1(3) . . . . ? 
C9 O1 C1 C6 -178.2(2) . . . . ? 
O1 C1 C2 C3 177.4(2) . . . . ? 
C6 C1 C2 C3 -1.2(3) . . . . ? 
C1 C2 C3 C4 0.0(4) . . . . ? 
C2 C3 C4 C5 0.3(4) . . . . ? 
C31 N1 C5 C4 -13.6(3) . . . . ? 
C8 N1 C5 C4 160.7(2) . . . . ? 
C31 N1 C5 C6 169.1(2) . . . . ? 
C8 N1 C5 C6 -16.6(3) . . . . ? 
C3 C4 C5 N1 -176.8(2) . . . . ? 
C3 C4 C5 C6 0.6(3) . . . . ? 
N1 C5 C6 C1 175.6(2) . . . . ? 
C4 C5 C6 C1 -1.7(3) . . . . ? 
N1 C5 C6 P1 -5.6(3) . . . . ? 
C4 C5 C6 P1 177.02(17) . . . . ? 
O1 C1 C6 C5 -176.71(19) . . . . ? 
C2 C1 C6 C5 2.1(3) . . . . ? 
O1 C1 C6 P1 4.5(3) . . . . ? 
C2 C1 C6 P1 -176.73(18) . . . . ? 
C7 P1 C6 C5 -9.0(2) . . . . ? 
C21 P1 C6 C5 106.57(19) . . . . ? 
C11 P1 C6 C5 -128.46(19) . . . . ? 
C7 P1 C6 C1 169.78(18) . . . . ? 
C21 P1 C6 C1 -74.7(2) . . . . ? 
C11 P1 C6 C1 50.3(2) . . . . ? 
C6 P1 C7 C8 42.47(17) . . . . ? 
C21 P1 C7 C8 -75.92(17) . . . . ? 
C11 P1 C7 C8 167.50(15) . . . . ? 
C5 N1 C8 C7 57.1(3) . . . . ? 
C31 N1 C8 C7 -128.4(2) . . . . ? 
P1 C7 C8 N1 -68.0(2) . . . . ? 
C6 P1 C11 C16 85.4(2) . . . . ? 
C7 P1 C11 C16 -30.7(2) . . . . ? 
C21 P1 C11 C16 -147.50(18) . . . . ? 
C6 P1 C11 C12 -98.5(2) . . . . ? 
C7 P1 C11 C12 145.36(18) . . . . ? 
C21 P1 C11 C12 28.6(2) . . . . ? 
C16 C11 C12 C13 0.8(4) . . . . ? 
P1 C11 C12 C13 -175.28(19) . . . . ? 
C11 C12 C13 C14 0.7(4) . . . . ? 
C12 C13 C14 C15 -1.4(4) . . . . ? 
C13 C14 C15 C16 0.7(4) . . . . ? 
C12 C11 C16 C15 -1.5(3) . . . . ? 
P1 C11 C16 C15 174.59(19) . . . . ? 
C14 C15 C16 C11 0.8(4) . . . . ? 
C6 P1 C21 C22 4.7(2) . . . . ? 
C7 P1 C21 C22 117.0(2) . . . . ? 
C11 P1 C21 C22 -125.46(19) . . . . ? 
C6 P1 C21 C26 -172.61(18) . . . . ? 
C7 P1 C21 C26 -60.2(2) . . . . ? 
C11 P1 C21 C26 57.3(2) . . . . ? 
C26 C21 C22 C23 -0.5(4) . . . . ? 
P1 C21 C22 C23 -177.77(19) . . . . ? 
C21 C22 C23 C24 1.0(4) . . . . ? 
C22 C23 C24 C25 -0.8(4) . . . . ? 
C23 C24 C25 C26 0.0(4) . . . . ? 
C24 C25 C26 C21 0.4(4) . . . . ? 
C22 C21 C26 C25 -0.2(4) . . . . ? 
P1 C21 C26 C25 177.2(2) . . . . ? 
C5 N1 C31 C32 120.7(2) . . . . ? 
C8 N1 C31 C32 -53.7(3) . . . . ? 
C5 N1 C31 C36 -61.6(3) . . . . ? 
C8 N1 C31 C36 124.0(2) . . . . ? 
C36 C31 C32 C33 0.5(3) . . . . ? 
N1 C31 C32 C33 178.2(2) . . . . ? 
C31 C32 C33 C34 0.4(4) . . . . ? 
C32 C33 C34 C35 -0.9(4) . . . . ? 
C32 C33 C34 C37 178.7(2) . . . . ? 
C33 C34 C35 C36 0.4(4) . . . . ? 
C37 C34 C35 C36 -179.2(2) . . . . ? 
C32 C31 C36 C35 -1.0(3) . . . . ? 
N1 C31 C36 C35 -178.7(2) . . . . ? 
C34 C35 C36 C31 0.6(4) . . . . ? 
O4 S1 C41 F1 176.55(18) . . . . ? 
O3 S1 C41 F1 56.3(2) . . . . ? 
O2 S1 C41 F1 -63.9(2) . . . . ? 
O4 S1 C41 F3 55.5(2) . . . . ? 
O3 S1 C41 F3 -64.8(2) . . . . ? 
O2 S1 C41 F3 174.97(19) . . . . ? 
O4 S1 C41 F2 -63.6(2) . . . . ? 
O3 S1 C41 F2 176.17(18) . . . . ? 
O2 S1 C41 F2 55.9(2) . . . . ? 
 
loop_ 
 _geom_hbond_atom_site_label_D 
 _geom_hbond_atom_site_label_H 
 _geom_hbond_atom_site_label_A 
 _geom_hbond_distance_DH 
 _geom_hbond_distance_HA 
 _geom_hbond_distance_DA 
 _geom_hbond_angle_DHA 
 _geom_hbond_site_symmetry_A 
C7 H7B O2  0.99 2.42 3.334(3) 154.0 1_655 
C16 H16 O2  0.95 2.48 3.383(3) 158.0 1_655 
C9 H9A O3  0.98 2.47 3.357(3) 149.7 3_667 
C32 H32 O4  0.95 2.56 3.413(3) 149.0 3_677 
 
_diffrn_measured_fraction_theta_max    0.940 
_diffrn_reflns_theta_full              26.00 
_diffrn_measured_fraction_theta_full   0.999 
_refine_diff_density_max    0.569 
_refine_diff_density_min   -0.370 
_refine_diff_density_rms    0.068 


#===END

 
data_virr125s_compound_6c 
 
_audit_creation_method            SHELXL-97 
_chemical_name_systematic 
; 
 ? 
; 
_chemical_name_common             ? 
_chemical_melting_point           ? 
_chemical_formula_moiety          ? 
_chemical_formula_sum 
 'C35 H27 Cl3 F3 N2 O5 P S' 
_chemical_formula_weight          781.97 
 
loop_ 
 _atom_type_symbol 
 _atom_type_description 
 _atom_type_scat_dispersion_real 
 _atom_type_scat_dispersion_imag 
 _atom_type_scat_source 
 'C'  'C'   0.0033   0.0016 
 'International Tables Vol C Tables 4.2.6.8 and 6.1.1.4' 
 'H'  'H'   0.0000   0.0000 
 'International Tables Vol C Tables 4.2.6.8 and 6.1.1.4' 
 'N'  'N'   0.0061   0.0033 
 'International Tables Vol C Tables 4.2.6.8 and 6.1.1.4' 
 'O'  'O'   0.0106   0.0060 
 'International Tables Vol C Tables 4.2.6.8 and 6.1.1.4' 
 'F'  'F'   0.0171   0.0103 
 'International Tables Vol C Tables 4.2.6.8 and 6.1.1.4' 
 'P'  'P'   0.1023   0.0942 
 'International Tables Vol C Tables 4.2.6.8 and 6.1.1.4' 
 'S'  'S'   0.1246   0.1234 
 'International Tables Vol C Tables 4.2.6.8 and 6.1.1.4' 
 'Cl'  'Cl'   0.1484   0.1585 
 'International Tables Vol C Tables 4.2.6.8 and 6.1.1.4' 
 
_symmetry_cell_setting            Monoclinic 
_symmetry_space_group_name_H-M    'P 21/c' 
 
loop_ 
 _symmetry_equiv_pos_as_xyz 
 'x, y, z' 
 '-x, y+1/2, -z+1/2' 
 '-x, -y, -z' 
 'x, -y-1/2, z-1/2' 
 
_cell_length_a                    10.6951(8) 
_cell_length_b                    13.5333(11) 
_cell_length_c                    23.7192(17) 
_cell_angle_alpha                 90.00 
_cell_angle_beta                  96.348(2) 
_cell_angle_gamma                 90.00 
_cell_volume                      3412.1(4) 
_cell_formula_units_Z             4 
_cell_measurement_temperature     100(2) 
_cell_measurement_reflns_used     9610 
_cell_measurement_theta_min       2.29
_cell_measurement_theta_max       28.48
 
_exptl_crystal_description        block
_exptl_crystal_colour             colourless
_exptl_crystal_size_max           0.29 
_exptl_crystal_size_mid           0.24 
_exptl_crystal_size_min           0.20 
_exptl_crystal_density_meas       ? 
_exptl_crystal_density_diffrn     1.522 
_exptl_crystal_density_method     'not measured' 
_exptl_crystal_F_000              1600 
_exptl_absorpt_coefficient_mu     0.440 
_exptl_absorpt_correction_type    multi-scan
_exptl_absorpt_correction_T_min   0.8414 
_exptl_absorpt_correction_T_max   0.9172 
_exptl_absorpt_process_details    SADABS 
 
_exptl_special_details 
; 
 ? 
; 
 
_diffrn_ambient_temperature       100(2) 
_diffrn_radiation_wavelength      0.71073 
_diffrn_radiation_type            MoK\a 
_diffrn_radiation_source          'fine-focus sealed tube' 
_diffrn_radiation_monochromator   graphite 
_diffrn_measurement_device_type   'Bruker SMART APEX CCD' 
_diffrn_measurement_method        \w-scan 
_diffrn_detector_area_resol_mean  8.26
_diffrn_standards_number          ? 
_diffrn_standards_interval_count  ? 
_diffrn_standards_interval_time   ? 
_diffrn_standards_decay_%         ? 
_diffrn_reflns_number             41180 
_diffrn_reflns_av_R_equivalents   0.0243 
_diffrn_reflns_av_sigmaI/netI     0.0199 
_diffrn_reflns_limit_h_min        -14 
_diffrn_reflns_limit_h_max        14 
_diffrn_reflns_limit_k_min        -18 
_diffrn_reflns_limit_k_max        18 
_diffrn_reflns_limit_l_min        -32 
_diffrn_reflns_limit_l_max        32 
_diffrn_reflns_theta_min          1.73 
_diffrn_reflns_theta_max          28.75 
_reflns_number_total              8332 
_reflns_number_gt                 7657 
_reflns_threshold_expression      >2sigma(I) 
 
_computing_data_collection        'Bruker SMART' 
_computing_cell_refinement        'Bruker SAINT'
_computing_data_reduction         'Bruker SAINT'
_computing_structure_solution     'SHELXS-97 (Sheldrick, 1990)' 
_computing_structure_refinement   'SHELXL-97 (Sheldrick, 1997)' 
_computing_molecular_graphics     'Bruker SHELXTL'
_computing_publication_material   'Bruker SHELXTL'
 
_refine_special_details 
; 
 Refinement of F^2^ against ALL reflections.  The weighted R-factor wR and 
 goodness of fit S are based on F^2^, conventional R-factors R are based 
 on F, with F set to zero for negative F^2^. The threshold expression of 
 F^2^ > 2sigma(F^2^) is used only for calculating R-factors(gt) etc. and is 
 not relevant to the choice of reflections for refinement.  R-factors based 
 on F^2^ are statistically about twice as large as those based on F, and R- 
 factors based on ALL data will be even larger. 
; 
 
_refine_ls_structure_factor_coef  Fsqd  
_refine_ls_matrix_type            full 
_refine_ls_weighting_scheme       calc  
_refine_ls_weighting_details 
 'calc w=1/[\s^2^(Fo^2^)+(0.0725P)^2^+3.1209P] where P=(Fo^2^+2Fc^2^)/3' 
_atom_sites_solution_primary      direct 
_atom_sites_solution_secondary    difmap 
_atom_sites_solution_hydrogens    geom 
_refine_ls_hydrogen_treatment     'Me rigid, others riding'
_refine_ls_extinction_method      none 
_refine_ls_extinction_coef        ? 
_refine_ls_number_reflns          8332 
_refine_ls_number_parameters      452 
_refine_ls_number_restraints      0 
_refine_ls_R_factor_all           0.0471 
_refine_ls_R_factor_gt            0.0435 
_refine_ls_wR_factor_ref          0.1234 
_refine_ls_wR_factor_gt           0.1205 
_refine_ls_goodness_of_fit_ref    1.049 
_refine_ls_restrained_S_all       1.049 
_refine_ls_shift/su_max           0.002 
_refine_ls_shift/su_mean          0.000 
 
loop_ 
 _atom_site_label 
 _atom_site_type_symbol 
 _atom_site_fract_x 
 _atom_site_fract_y 
 _atom_site_fract_z 
 _atom_site_U_iso_or_equiv 
 _atom_site_adp_type 
 _atom_site_occupancy 
 _atom_site_symmetry_multiplicity 
 _atom_site_calc_flag 
 _atom_site_refinement_flags 
 _atom_site_disorder_assembly 
 _atom_site_disorder_group 
P1 P 0.29781(4) 0.09923(3) 0.153750(17) 0.01061(10) Uani 1 1 d . . . 
N1 N 0.57500(13) 0.12475(11) 0.20896(6) 0.0120(3) Uani 1 1 d . . . 
N2 N 1.02475(13) 0.06817(11) 0.26154(6) 0.0149(3) Uani 1 1 d . . . 
O1 O 1.02588(12) 0.00854(10) 0.22254(6) 0.0199(3) Uani 1 1 d . . . 
O2 O 1.11477(12) 0.08143(11) 0.29774(6) 0.0212(3) Uani 1 1 d . . . 
C1 C 0.42439(15) 0.15644(12) 0.12423(7) 0.0116(3) Uani 1 1 d . . . 
C2 C 0.39991(16) 0.19740(13) 0.06965(7) 0.0152(3) Uani 1 1 d . . . 
H2 H 0.3186 0.1902 0.0495 0.018 Uiso 1 1 calc R . . 
C3 C 0.49124(17) 0.24775(13) 0.04475(7) 0.0164(3) Uani 1 1 d . . . 
H3 H 0.4737 0.2753 0.0079 0.020 Uiso 1 1 calc R . . 
C4 C 0.61028(17) 0.25737(14) 0.07499(8) 0.0176(3) Uani 1 1 d . . . 
H4 H 0.6739 0.2926 0.0585 0.021 Uiso 1 1 calc R . . 
C5 C 0.63743(16) 0.21666(13) 0.12843(7) 0.0157(3) Uani 1 1 d . . . 
H5 H 0.7195 0.2236 0.1479 0.019 Uiso 1 1 calc R . . 
C6 C 0.54447(15) 0.16490(12) 0.15441(7) 0.0120(3) Uani 1 1 d . . . 
C7 C 0.36466(15) 0.06537(12) 0.22100(7) 0.0122(3) Uani 1 1 d . . . 
H7 H 0.3125 0.0353 0.2460 0.015 Uiso 1 1 calc R . . 
C8 C 0.48811(15) 0.07980(12) 0.23953(7) 0.0115(3) Uani 1 1 d . . . 
C11 C 0.24482(15) -0.00506(12) 0.11071(7) 0.0125(3) Uani 1 1 d . . . 
C12 C 0.11887(16) -0.03260(13) 0.09832(7) 0.0152(3) Uani 1 1 d . . . 
H12 H 0.0540 0.0065 0.1112 0.018 Uiso 1 1 calc R . . 
C13 C 0.08950(17) -0.11806(14) 0.06684(8) 0.0187(4) Uani 1 1 d . . . 
H13 H 0.0040 -0.1364 0.0574 0.022 Uiso 1 1 calc R . . 
C14 C 0.18455(19) -0.17648(15) 0.04928(8) 0.0224(4) Uani 1 1 d . . . 
H14 H 0.1638 -0.2347 0.0279 0.027 Uiso 1 1 calc R . . 
C15 C 0.30973(18) -0.15039(15) 0.06271(9) 0.0224(4) Uani 1 1 d . . . 
H15 H 0.3744 -0.1913 0.0511 0.027 Uiso 1 1 calc R . . 
C16 C 0.34029(17) -0.06447(13) 0.09309(8) 0.0172(3) Uani 1 1 d . . . 
H16 H 0.4259 -0.0460 0.1019 0.021 Uiso 1 1 calc R . . 
C21 C 0.17324(15) 0.18737(12) 0.15825(7) 0.0130(3) Uani 1 1 d . . . 
C22 C 0.08016(16) 0.20545(13) 0.11339(8) 0.0164(3) Uani 1 1 d . . . 
H22 H 0.0771 0.1675 0.0796 0.020 Uiso 1 1 calc R . . 
C23 C -0.00802(17) 0.27942(14) 0.11865(8) 0.0199(4) Uani 1 1 d . . . 
H23 H -0.0717 0.2918 0.0883 0.024 Uiso 1 1 calc R . . 
C24 C -0.00363(17) 0.33539(14) 0.16803(9) 0.0199(4) Uani 1 1 d . . . 
H24 H -0.0647 0.3854 0.1714 0.024 Uiso 1 1 calc R . . 
C25 C 0.08972(17) 0.31832(13) 0.21244(8) 0.0177(3) Uani 1 1 d . . . 
H25 H 0.0930 0.3570 0.2460 0.021 Uiso 1 1 calc R . . 
C26 C 0.17834(16) 0.24451(13) 0.20766(7) 0.0147(3) Uani 1 1 d . . . 
H26 H 0.2424 0.2328 0.2380 0.018 Uiso 1 1 calc R . . 
C31 C 0.53489(15) 0.04627(12) 0.29826(7) 0.0122(3) Uani 1 1 d . . . 
C32 C 0.48403(17) 0.08835(14) 0.34431(8) 0.0184(3) Uani 1 1 d . . . 
H32 H 0.4197 0.1368 0.3382 0.022 Uiso 1 1 calc R . . 
C33 C 0.52745(19) 0.05935(15) 0.39919(8) 0.0223(4) Uani 1 1 d . . . 
H33 H 0.4942 0.0893 0.4306 0.027 Uiso 1 1 calc R . . 
C34 C 0.61920(18) -0.01324(15) 0.40840(8) 0.0210(4) Uani 1 1 d . . . 
H34 H 0.6490 -0.0327 0.4460 0.025 Uiso 1 1 calc R . . 
C35 C 0.66714(17) -0.05728(13) 0.36255(8) 0.0180(3) Uani 1 1 d . . . 
H35 H 0.7285 -0.1080 0.3688 0.022 Uiso 1 1 calc R . . 
C36 C 0.62616(16) -0.02777(13) 0.30745(7) 0.0137(3) Uani 1 1 d . . . 
H36 H 0.6599 -0.0577 0.2762 0.016 Uiso 1 1 calc R . . 
C41 C 0.69412(15) 0.15408(12) 0.23918(7) 0.0122(3) Uani 1 1 d . . . 
C42 C 0.79999(15) 0.09684(12) 0.23435(7) 0.0122(3) Uani 1 1 d . . . 
H42 H 0.7965 0.0395 0.2111 0.015 Uiso 1 1 calc R . . 
C43 C 0.91111(15) 0.12731(13) 0.26498(7) 0.0134(3) Uani 1 1 d . . . 
C44 C 0.91993(16) 0.21183(14) 0.29840(7) 0.0166(3) Uani 1 1 d . . . 
H44 H 0.9973 0.2302 0.3193 0.020 Uiso 1 1 calc R . . 
C45 C 0.81316(17) 0.26837(13) 0.30035(8) 0.0176(3) Uani 1 1 d . . . 
H45 H 0.8182 0.3274 0.3221 0.021 Uiso 1 1 calc R . . 
C46 C 0.69778(16) 0.24095(13) 0.27109(8) 0.0156(3) Uani 1 1 d . . . 
C47 C 0.58229(18) 0.30263(14) 0.27392(9) 0.0236(4) Uani 1 1 d . . . 
H47A H 0.5409 0.3137 0.2355 0.028 Uiso 1 1 calc R . . 
H47B H 0.6060 0.3663 0.2917 0.028 Uiso 1 1 calc R . . 
H47C H 0.5244 0.2682 0.2965 0.028 Uiso 1 1 calc R . . 
C51 C 0.26888(16) 0.04514(13) 0.92843(8) 0.0164(3) Uani 1 1 d . . . 
F1 F 0.21651(11) 0.07631(9) 0.97397(5) 0.0234(2) Uani 1 1 d . . . 
F2 F 0.19390(11) -0.02564(9) 0.90376(5) 0.0255(3) Uani 1 1 d . . . 
F3 F 0.37851(11) 0.00333(9) 0.94674(6) 0.0285(3) Uani 1 1 d . . . 
S1 S 0.28812(4) 0.14668(3) 0.878980(18) 0.01498(10) Uani 1 1 d . . . 
O3 O 0.16181(13) 0.18432(12) 0.86692(7) 0.0288(3) Uani 1 1 d . . . 
O4 O 0.37473(14) 0.21219(11) 0.91117(6) 0.0266(3) Uani 1 1 d . . . 
O5 O 0.33714(15) 0.09735(11) 0.83210(6) 0.0272(3) Uani 1 1 d . . . 
C52 C 0.1118(2) 0.39606(15) 0.93113(8) 0.0235(4) Uani 1 1 d . . . 
H52 H 0.1306 0.3479 0.9012 0.028 Uiso 1 1 calc R . . 
Cl1 Cl 0.12741(6) 0.33693(4) 0.99757(2) 0.03105(13) Uani 1 1 d . . . 
Cl2 Cl -0.04604(5) 0.43831(4) 0.91649(2) 0.03271(13) Uani 1 1 d . . . 
Cl3 Cl 0.21595(5) 0.49732(4) 0.93135(2) 0.03227(13) Uani 1 1 d . . . 
 
loop_ 
 _atom_site_aniso_label 
 _atom_site_aniso_U_11 
 _atom_site_aniso_U_22 
 _atom_site_aniso_U_33 
 _atom_site_aniso_U_23 
 _atom_site_aniso_U_13 
 _atom_site_aniso_U_12 
P1 0.00897(19) 0.0110(2) 0.0116(2) 0.00041(14) -0.00015(14) 0.00004(14) 
N1 0.0100(6) 0.0127(6) 0.0128(6) 0.0002(5) -0.0011(5) -0.0018(5) 
N2 0.0114(6) 0.0170(7) 0.0165(7) 0.0043(6) 0.0025(5) -0.0011(5) 
O1 0.0177(6) 0.0200(6) 0.0226(7) -0.0029(5) 0.0045(5) 0.0011(5) 
O2 0.0110(6) 0.0307(7) 0.0209(6) 0.0020(5) -0.0024(5) 0.0003(5) 
C1 0.0111(7) 0.0111(7) 0.0126(7) 0.0000(6) 0.0013(6) -0.0005(6) 
C2 0.0151(8) 0.0168(8) 0.0130(8) 0.0001(6) -0.0015(6) 0.0002(6) 
C3 0.0186(8) 0.0180(8) 0.0125(7) 0.0023(6) 0.0012(6) -0.0005(6) 
C4 0.0169(8) 0.0183(8) 0.0180(8) 0.0017(7) 0.0041(7) -0.0039(6) 
C5 0.0128(7) 0.0171(8) 0.0169(8) 0.0000(6) 0.0005(6) -0.0042(6) 
C6 0.0129(7) 0.0105(7) 0.0123(7) -0.0010(6) 0.0010(6) -0.0004(6) 
C7 0.0115(7) 0.0132(7) 0.0117(7) 0.0018(6) 0.0006(6) 0.0010(6) 
C8 0.0129(7) 0.0092(7) 0.0123(7) -0.0016(6) 0.0014(6) 0.0015(6) 
C11 0.0125(7) 0.0131(8) 0.0116(7) 0.0006(6) 0.0003(6) -0.0015(6) 
C12 0.0123(7) 0.0179(8) 0.0150(8) 0.0014(6) -0.0004(6) -0.0004(6) 
C13 0.0159(8) 0.0210(9) 0.0186(8) -0.0015(7) -0.0007(6) -0.0051(7) 
C14 0.0253(9) 0.0207(9) 0.0215(9) -0.0083(7) 0.0041(7) -0.0052(7) 
C15 0.0202(9) 0.0209(9) 0.0276(10) -0.0086(8) 0.0092(7) -0.0004(7) 
C16 0.0140(8) 0.0189(9) 0.0191(8) -0.0016(7) 0.0035(6) -0.0014(6) 
C21 0.0111(7) 0.0114(7) 0.0168(8) 0.0026(6) 0.0024(6) 0.0005(6) 
C22 0.0158(8) 0.0166(8) 0.0163(8) 0.0016(6) -0.0004(6) 0.0019(6) 
C23 0.0151(8) 0.0205(9) 0.0236(9) 0.0050(7) -0.0003(7) 0.0029(7) 
C24 0.0171(8) 0.0157(8) 0.0279(10) 0.0044(7) 0.0066(7) 0.0048(6) 
C25 0.0199(8) 0.0145(8) 0.0198(8) 0.0006(6) 0.0070(7) 0.0005(7) 
C26 0.0141(7) 0.0135(8) 0.0166(8) 0.0020(6) 0.0020(6) -0.0013(6) 
C31 0.0111(7) 0.0123(7) 0.0128(7) -0.0002(6) -0.0007(6) -0.0014(6) 
C32 0.0198(8) 0.0189(8) 0.0167(8) -0.0016(7) 0.0026(7) 0.0049(7) 
C33 0.0273(10) 0.0255(10) 0.0144(8) -0.0026(7) 0.0034(7) 0.0030(8) 
C34 0.0236(9) 0.0251(9) 0.0134(8) 0.0030(7) -0.0020(7) 0.0010(7) 
C35 0.0180(8) 0.0159(8) 0.0194(9) 0.0030(7) -0.0006(7) 0.0024(6) 
C36 0.0140(7) 0.0127(7) 0.0142(8) -0.0011(6) 0.0002(6) 0.0005(6) 
C41 0.0112(7) 0.0129(7) 0.0121(7) 0.0011(6) -0.0013(6) -0.0020(6) 
C42 0.0131(7) 0.0120(7) 0.0115(7) 0.0004(6) 0.0010(6) -0.0009(6) 
C43 0.0112(7) 0.0150(8) 0.0141(7) 0.0022(6) 0.0017(6) -0.0002(6) 
C44 0.0144(8) 0.0199(8) 0.0148(8) -0.0004(6) -0.0019(6) -0.0049(6) 
C45 0.0193(8) 0.0146(8) 0.0184(8) -0.0040(6) -0.0004(7) -0.0024(6) 
C46 0.0158(8) 0.0126(8) 0.0181(8) -0.0006(6) 0.0002(6) 0.0002(6) 
C47 0.0197(9) 0.0150(8) 0.0348(11) -0.0071(8) -0.0023(8) 0.0041(7) 
C51 0.0137(8) 0.0167(8) 0.0188(8) 0.0007(7) 0.0016(6) 0.0015(6) 
F1 0.0247(6) 0.0302(6) 0.0159(5) 0.0011(4) 0.0050(4) 0.0003(5) 
F2 0.0263(6) 0.0204(6) 0.0302(6) -0.0029(5) 0.0048(5) -0.0083(5) 
F3 0.0175(6) 0.0289(6) 0.0387(7) 0.0140(5) 0.0008(5) 0.0073(5) 
S1 0.0147(2) 0.0163(2) 0.0135(2) 0.00067(15) -0.00006(15) -0.00062(15) 
O3 0.0201(7) 0.0347(8) 0.0307(8) 0.0119(6) -0.0006(6) 0.0080(6) 
O4 0.0324(8) 0.0235(7) 0.0224(7) -0.0007(6) -0.0036(6) -0.0119(6) 
O5 0.0331(8) 0.0290(8) 0.0214(7) -0.0057(6) 0.0125(6) -0.0064(6) 
C52 0.0300(10) 0.0203(9) 0.0193(9) 0.0017(7) -0.0012(7) -0.0002(8) 
Cl1 0.0443(3) 0.0266(3) 0.0210(2) 0.00543(18) -0.0016(2) -0.0020(2) 
Cl2 0.0286(3) 0.0333(3) 0.0355(3) -0.0006(2) 0.0005(2) 0.0031(2) 
Cl3 0.0285(3) 0.0328(3) 0.0340(3) 0.0086(2) -0.0030(2) -0.0074(2) 
 
_geom_special_details 
; 
 All esds (except the esd in the dihedral angle between two l.s. planes) 
 are estimated using the full covariance matrix.  The cell esds are taken 
 into account individually in the estimation of esds in distances, angles 
 and torsion angles; correlations between esds in cell parameters are only 
 used when they are defined by crystal symmetry.  An approximate (isotropic) 
 treatment of cell esds is used for estimating esds involving l.s. planes. 
; 
 
loop_ 
 _geom_bond_atom_site_label_1 
 _geom_bond_atom_site_label_2 
 _geom_bond_distance 
 _geom_bond_site_symmetry_2 
 _geom_bond_publ_flag 
P1 C7 1.7359(17) . ? 
P1 C1 1.7697(17) . ? 
P1 C11 1.7965(17) . ? 
P1 C21 1.8001(17) . ? 
N1 C8 1.381(2) . ? 
N1 C6 1.408(2) . ? 
N1 C41 1.447(2) . ? 
N2 O1 1.229(2) . ? 
N2 O2 1.230(2) . ? 
N2 C43 1.465(2) . ? 
C1 C6 1.404(2) . ? 
C1 C2 1.406(2) . ? 
C2 C3 1.377(2) . ? 
C3 C4 1.397(2) . ? 
C4 C5 1.383(2) . ? 
C5 C6 1.412(2) . ? 
C7 C8 1.359(2) . ? 
C8 C31 1.497(2) . ? 
C11 C12 1.397(2) . ? 
C11 C16 1.399(2) . ? 
C12 C13 1.394(3) . ? 
C13 C14 1.388(3) . ? 
C14 C15 1.387(3) . ? 
C15 C16 1.388(3) . ? 
C21 C22 1.396(2) . ? 
C21 C26 1.400(2) . ? 
C22 C23 1.390(2) . ? 
C23 C24 1.391(3) . ? 
C24 C25 1.388(3) . ? 
C25 C26 1.390(2) . ? 
C31 C32 1.395(2) . ? 
C31 C36 1.399(2) . ? 
C32 C33 1.390(3) . ? 
C33 C34 1.389(3) . ? 
C34 C35 1.387(3) . ? 
C35 C36 1.390(2) . ? 
C41 C42 1.387(2) . ? 
C41 C46 1.396(2) . ? 
C42 C43 1.385(2) . ? 
C43 C44 1.389(2) . ? 
C44 C45 1.380(3) . ? 
C45 C46 1.397(2) . ? 
C46 C47 1.498(2) . ? 
C51 F3 1.331(2) . ? 
C51 F1 1.339(2) . ? 
C51 F2 1.341(2) . ? 
C51 S1 1.8330(19) . ? 
S1 O4 1.4390(14) . ? 
S1 O3 1.4424(14) . ? 
S1 O5 1.4442(14) . ? 
C52 Cl1 1.759(2) . ? 
C52 Cl3 1.766(2) . ? 
C52 Cl2 1.780(2) . ? 
 
loop_ 
 _geom_angle_atom_site_label_1 
 _geom_angle_atom_site_label_2 
 _geom_angle_atom_site_label_3 
 _geom_angle 
 _geom_angle_site_symmetry_1 
 _geom_angle_site_symmetry_3 
 _geom_angle_publ_flag 
C7 P1 C1 102.93(8) . . ? 
C7 P1 C11 112.75(8) . . ? 
C1 P1 C11 109.02(8) . . ? 
C7 P1 C21 110.66(8) . . ? 
C1 P1 C21 109.70(8) . . ? 
C11 P1 C21 111.42(8) . . ? 
C8 N1 C6 123.45(14) . . ? 
C8 N1 C41 117.87(14) . . ? 
C6 N1 C41 116.84(13) . . ? 
O1 N2 O2 123.31(15) . . ? 
O1 N2 C43 118.55(14) . . ? 
O2 N2 C43 118.14(15) . . ? 
C6 C1 C2 120.26(15) . . ? 
C6 C1 P1 122.04(13) . . ? 
C2 C1 P1 117.65(12) . . ? 
C3 C2 C1 121.44(16) . . ? 
C2 C3 C4 118.39(16) . . ? 
C5 C4 C3 121.38(16) . . ? 
C4 C5 C6 120.71(16) . . ? 
C1 C6 N1 122.90(15) . . ? 
C1 C6 C5 117.80(15) . . ? 
N1 C6 C5 119.30(15) . . ? 
C8 C7 P1 123.10(13) . . ? 
C7 C8 N1 125.41(15) . . ? 
C7 C8 C31 118.05(15) . . ? 
N1 C8 C31 116.53(14) . . ? 
C12 C11 C16 120.15(16) . . ? 
C12 C11 P1 124.43(13) . . ? 
C16 C11 P1 115.24(13) . . ? 
C13 C12 C11 119.28(16) . . ? 
C14 C13 C12 120.30(17) . . ? 
C15 C14 C13 120.43(17) . . ? 
C14 C15 C16 119.89(17) . . ? 
C15 C16 C11 119.92(16) . . ? 
C22 C21 C26 119.98(16) . . ? 
C22 C21 P1 122.76(13) . . ? 
C26 C21 P1 117.06(13) . . ? 
C23 C22 C21 119.43(17) . . ? 
C22 C23 C24 120.50(17) . . ? 
C25 C24 C23 120.18(17) . . ? 
C24 C25 C26 119.82(17) . . ? 
C25 C26 C21 120.08(16) . . ? 
C32 C31 C36 119.75(16) . . ? 
C32 C31 C8 119.06(15) . . ? 
C36 C31 C8 121.18(15) . . ? 
C33 C32 C31 119.98(17) . . ? 
C34 C33 C32 120.28(17) . . ? 
C35 C34 C33 119.78(17) . . ? 
C34 C35 C36 120.54(17) . . ? 
C35 C36 C31 119.63(16) . . ? 
C42 C41 C46 122.74(15) . . ? 
C42 C41 N1 119.22(15) . . ? 
C46 C41 N1 118.03(15) . . ? 
C43 C42 C41 116.82(15) . . ? 
C42 C43 C44 123.00(16) . . ? 
C42 C43 N2 118.50(15) . . ? 
C44 C43 N2 118.50(15) . . ? 
C45 C44 C43 118.14(16) . . ? 
C44 C45 C46 121.65(16) . . ? 
C41 C46 C45 117.59(16) . . ? 
C41 C46 C47 121.30(16) . . ? 
C45 C46 C47 121.12(16) . . ? 
F3 C51 F1 107.64(15) . . ? 
F3 C51 F2 107.54(15) . . ? 
F1 C51 F2 107.08(14) . . ? 
F3 C51 S1 111.74(12) . . ? 
F1 C51 S1 111.51(12) . . ? 
F2 C51 S1 111.11(12) . . ? 
O4 S1 O3 114.93(10) . . ? 
O4 S1 O5 115.22(9) . . ? 
O3 S1 O5 114.98(10) . . ? 
O4 S1 C51 103.51(8) . . ? 
O3 S1 C51 102.87(9) . . ? 
O5 S1 C51 102.84(9) . . ? 
Cl1 C52 Cl3 110.69(11) . . ? 
Cl1 C52 Cl2 108.35(11) . . ? 
Cl3 C52 Cl2 109.61(11) . . ? 
 
loop_ 
 _geom_hbond_atom_site_label_D 
 _geom_hbond_atom_site_label_H 
 _geom_hbond_atom_site_label_A 
 _geom_hbond_distance_DH 
 _geom_hbond_distance_HA 
 _geom_hbond_distance_DA 
 _geom_hbond_angle_DHA 
 _geom_hbond_site_symmetry_A 
C25 H25 O1  0.95 2.57 3.310(2) 135.2 2_655 
C2 H2 F1  0.95 2.52 3.271(2) 136.2 1_554 
C3 H3 O4  0.95 2.56 3.309(2) 135.5 1_554 
C13 H13 F1  0.95 2.53 3.357(2) 145.9 3_556 
C42 H42 O5  0.95 2.49 3.321(2) 146.2 3_656 
C44 H44 O3  0.95 2.30 3.222(2) 164.8 4_665 
C52 H52 O3  1.00 2.39 3.316(3) 152.9 . 
 
_diffrn_measured_fraction_theta_max    0.940 
_diffrn_reflns_theta_full              26.00 
_diffrn_measured_fraction_theta_full   1.000 
_refine_diff_density_max    0.666 
_refine_diff_density_min   -0.982 
_refine_diff_density_rms    0.083 


#===END
